# Supplementary material for: A highly selective JAK3 inhibitor is developed for treating rheumatoid arthritis by suppressing γc cytokine–related JAK-STAT signal
Source: PubMed Central journal article supplement — Sci Adv. 2022 Aug 19;8(33):eabo4363. doi: 10.1126/sciadv.abo4363 (PMC9390995; doi:10.1126/sciadv.abo4363), 2022-08-19
Supplement: sciadv.abo4363_sm.pdf [file sciadv.abo4363_sm.pdf]

Supplementary Materials for

**A highly selective JAK3 inhibitor is developed for treating rheumatoid arthritis by suppressing  $\gamma$ c cytokine-related JAK-STAT signal**

Chengjuan Chen *et al.*

Corresponding author: Tiantai Zhang, ttzhang@imm.ac.cn; Lan Sun, sunhanxing2005@imm.ac.cn; Dayong Zhang, cpuzdy@163.com

*Sci. Adv.* **8**, eabo4363 (2022)  
DOI: 10.1126/sciadv.abo4363

**This PDF file includes:**

Supplementary Text  
Figs. S1 to S6  
Tables S1 to S6

## Supplementary Text

### Stability of Z583 in hepatocytes

The hepatocytes of human (from 10 Donor Pooled), rat (male CD-1), and dog (male Beagle) were used to perform the stability of Z583 by Pharmaron Inc., (Beijing, China). Briefly, prepare 10 mM stock solutions of Z583 and positive control in appropriate solvent (DMSO). In separate conical tubes, dilute the 10 mM test compound and the positive control to 100  $\mu$ M by combining 495  $\mu$ l of 50% acetonitrile/50% water and 5  $\mu$ l of 10 mM stock. Place incubation medium (William's E Medium supplemented with GlutaMAX) and hepatocyte thawing medium in a 37°C water bath, and allow warming for at least 15 min prior to use. Remove a vial of cryopreserved hepatocytes from storage, ensuring that vials remain at cryogenic temperatures until thawing process ensues. Thaw the cells by placing the vial in a 37°C water bath and gently shaking the vials for 2 minutes. After thawing is completed, spray vial with 70% ethanol, transfer the vial to a biosafety cabinet. Dilute cells with incubation medium to a working cell density of  $0.5 \times 10^6$  viable cells/ml. A portion of the hepatocytes at  $0.5 \times 10^6$  viable cells/ml should be boiled for 5 min prior to adding to the plate as representative of a negative control. Place the plate in the incubator on an orbital shaker to allow the hepatocytes to warm for 10 min. Remove well contents in 25  $\mu$ l aliquots at time points of 0, 15, 30, 60, 90 and 120 min. The aliquots are then mixed with 6 volumes (150  $\mu$ l) of acetonitrile containing internal standards (IS: 100 nM alprazolam, 200 nM labetalol, 200 nM caffeine and 2  $\mu$ M ketoprofen) to terminate the reaction. Centrifuge the plate for 20 minutes at 3,220 g. Aliquot of 100  $\mu$ l of the supernatant was mixed with 100  $\mu$ l of ultra-pure H<sub>2</sub>O and then used for LC-MS/MS analysis. All incubations will be performed in duplicate. All calculations were carried out using Microsoft Excel. Peak areas were determined from extracted ion chromatograms. Determine the *in vitro* half-life ( $t_{1/2}$ ) of parent compound by regression analysis of the percent parent disappearance vs. time curve. The *in vitro* half-life (*in vitro*  $t_{1/2}$ ) was determined from the slope value: *in vitro*  $t_{1/2} = 0.693 / k$ . Conversion of the *in vitro*  $t_{1/2}$  (in min) into the scale-up intrinsic clearance (Scaled-up CL<sub>int</sub>, in ml/min/kg) was done using the following equation (mean of duplicate determinations):

Scaled-up CL<sub>int</sub> =  $kV/N \times$  scaling factor (V: incubation volume, 0.2 ml; N: number of hepatocytes per well,  $0.1 \times 10^6$  cells).

### Stability of Z583 in Whole Blood

The whole blood of human (from health Mongloid volunteers, collected local hospital with Ethical approval, gender mixed), Rat (CD-1, gender mixed), and dog (Beagle, gender mixed) was used to perform the stability of Z583 by Pharmaron Inc., (Beijing, China). Briefly, 1 mM working solution of Z583 was prepared in DMSO, 1 mM working solution of control compound propantheline was prepared in acetonitrile. 4  $\mu$ l of working solutions was spiked to 796  $\mu$ l of pre-incubated whole blood to reach a final concentration of 5  $\mu$ M. The final concentration of solvent was 0.5%. 50  $\mu$ l aliquots of the spiked whole blood were added into new tubes for different time points including 15, 30, 60 and 120 min and incubated at 37°C water bath with shaking at 60 rpm. The assay was performed in duplicate. The reaction was stopped by adding 300  $\mu$ l of room temperature quench solution (acetonitrile containing internal standards (IS, 100 nM Alprazolam, 500 nM Labetalol and 2  $\mu$ M Ketoprofen) to the spiked whole blood samples at the appointed time points. Time 0 samples were prepared by adding 50  $\mu$ l of the spiked whole blood to new tubes containing 300  $\mu$ l of room temperature quench solution. Vortex for 5 min and samples in plate were centrifuged at 3,220 g for 30 min at 4°C to precipitate protein. And then 100  $\mu$ l of the supernatant was transferred to a new 96-well plate with 100  $\mu$ l water for LC-MS/MS analysis. All calculations were carried out using Microsoft Excel. Peak area ratios were determined from extracted ion chromatograms. Percent compounds remaining at each time point were calculated by the following equation:

$$\text{Remaining Percentage t min (\%)} = \text{Peak Area Ratio t min} / \text{Peak Area Ratio 0 min} \times 100$$

Where Peak Area Ratio t min is peak area ratio of control and test compound at t min;

Peak Area Ratio 0 min is peak area ratio of control and test compound at zero time point.

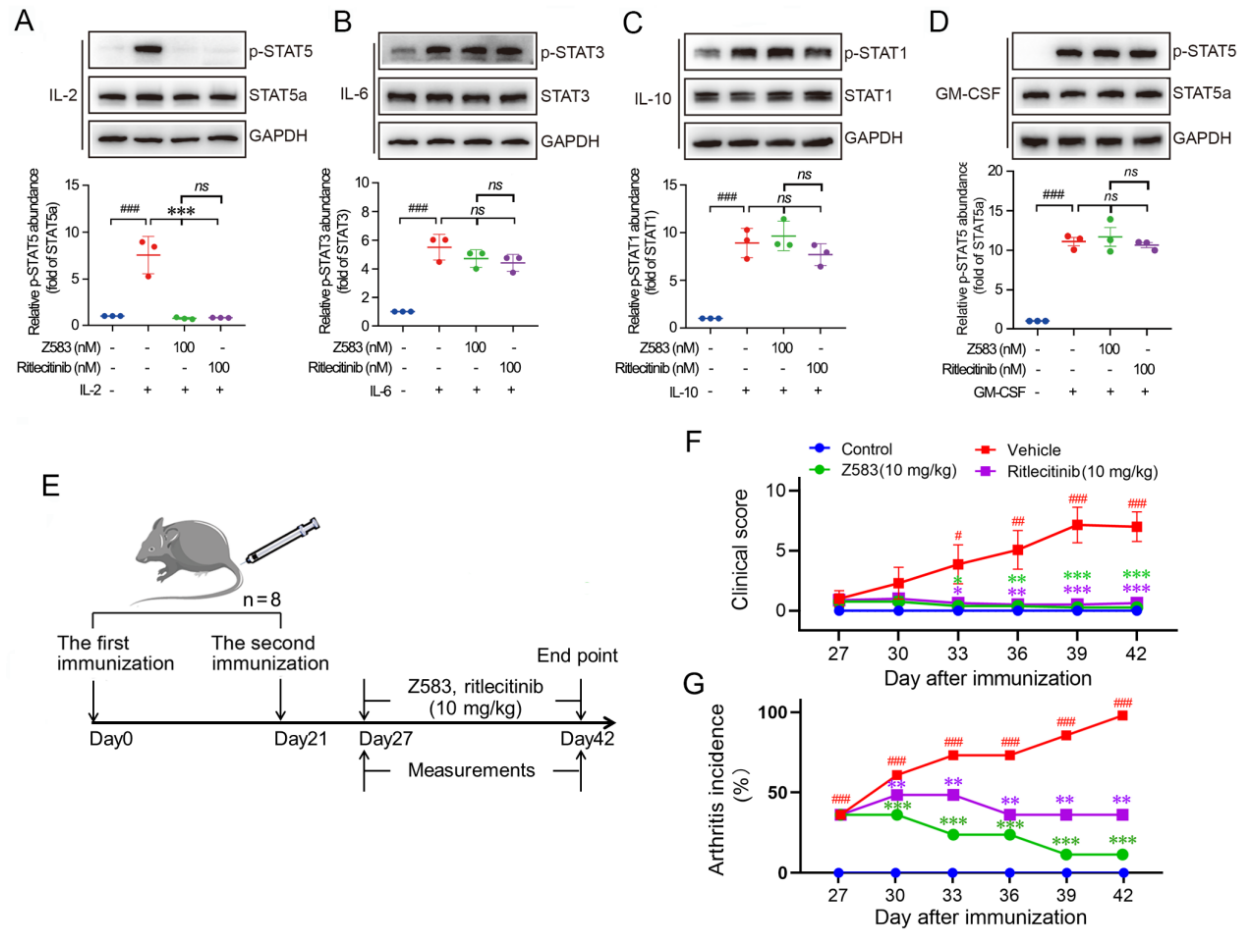

**Fig S1. The effects of Z583 and ritlecitinib *in vitro* signaling level and RA treatment *in vivo*.** Human PBMCs with or without Z583 and ritlecitinib were stimulated with  $\gamma$ c-associated IL-2 (A) and other cytokines (B-D). All data are from three independent experiments. Data are presented as means  $\pm$  SEM.  $####P < 0.001$  versus control group;  $***P < 0.001$  versus alone cytokine-stimulating group; and *ns*, no statistical significance. (E) Experimental scheme of Z583 and ritlecitinib for the treatment of CIA. Clinical score (F) and CIA incidence (G) were assessed every three days in control, CIA mice, Z583-treated CIA mice, and ritlecitinib-treated CIA mice. Data are presented as means  $\pm$  SEM,  $n = 8$ .  $^{\#}P < 0.05$ ,  $^{\#\#}P < 0.01$ , and  $^{\#\#\#}P < 0.001$  versus control group;  $^*P < 0.05$ ,  $^{**}P < 0.01$ , and  $^{***}P < 0.001$  versus CIA group.

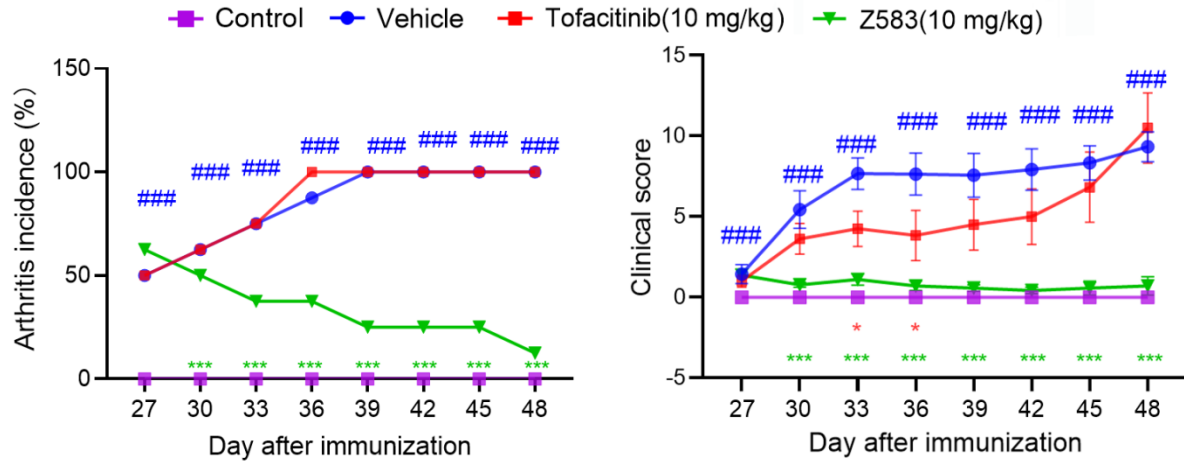

**Fig. S2. Prophylactic effect of Z583 and tofacitinib in CIA mice.** Clinical score and CIA incidence were assessed every three days in control, vehicle CIA mice, tofacitinib-treated CIA mice, and Z583-treated CIA mice. Data are presented as means  $\pm$  SEM,  $n = 8$ . ###  $P < 0.001$  versus control group; \*\*\*  $P < 0.001$  versus CIA group.

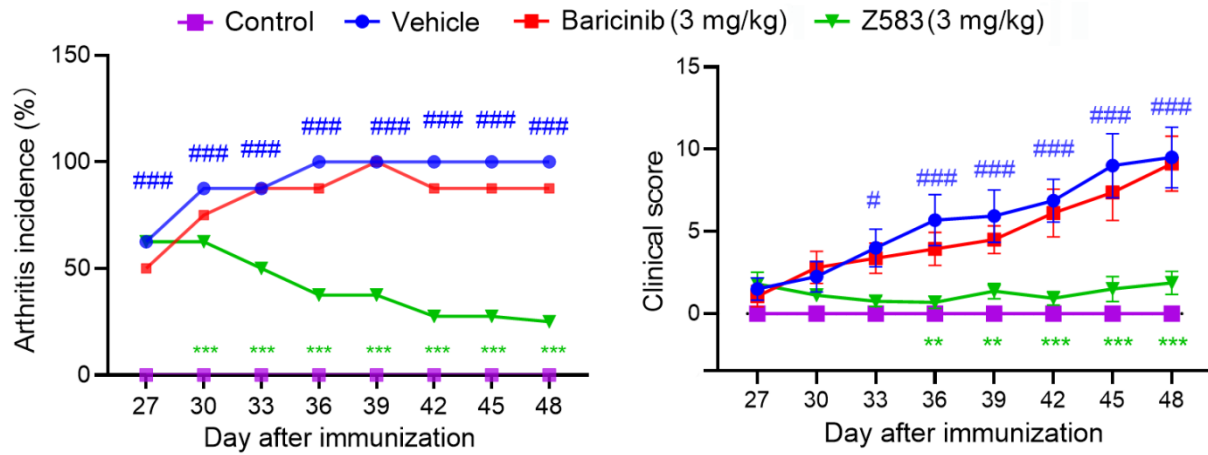

**Fig. S3. Prophylactic effect of Z583 and baricininib in CIA mice.** Clinical score and CIA incidence were assessed every three days in control, vehicle CIA mice, baricininib-treated CIA mice, and Z583-treated CIA mice. Data are presented as means  $\pm$  SEM,  $n = 8$ . # $P < 0.05$ , and ### $P < 0.001$  versus control group; \* $P < 0.01$ , and \*\*\* $P < 0.001$  versus CIA group.

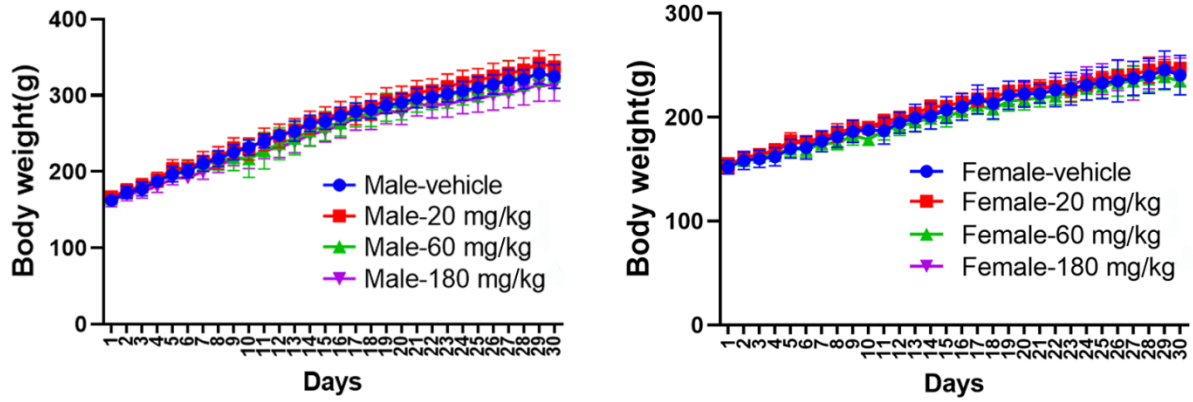

**Fig. S4. The changes of body weight of rats in subacute toxicity analysis.** The body weight of male- and female-rats were measured after treating with Z583 (20, 60, and 180 mg/kg, p.o.) for four weeks.

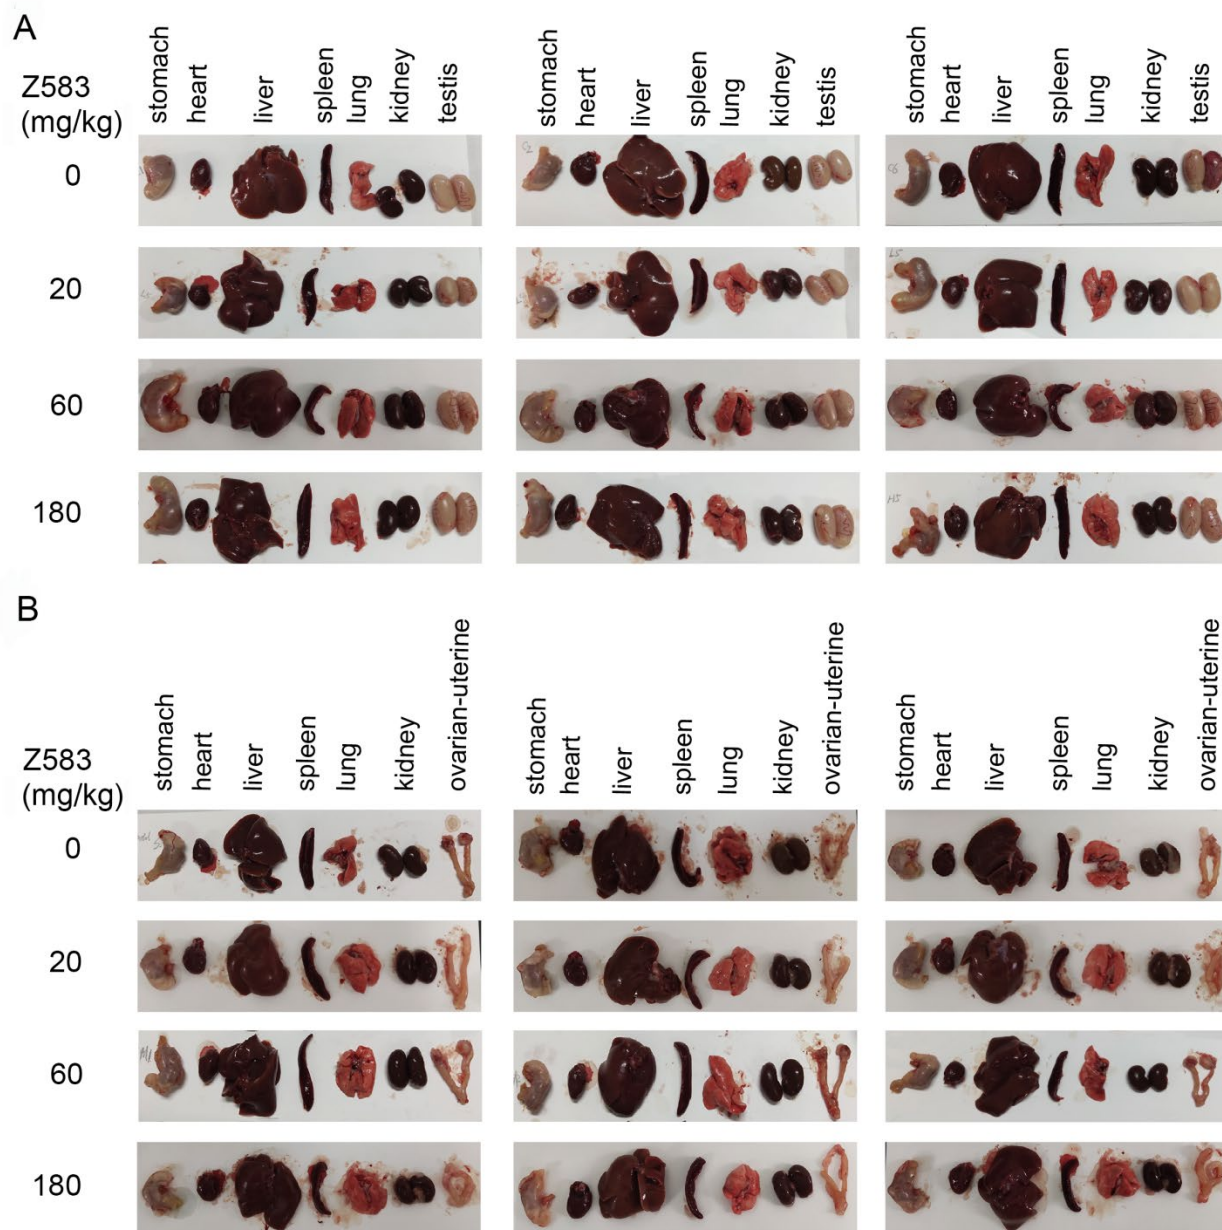

**Fig. S5. Represented images of organs from subacute toxicity experiment.** Macroscopic images obtained from heart, liver, spleen, lung, kidney stomach, testis, ovarian and uterine of (A) male and (B) female rat after treating with Z583 (20, 60, and 180 mg/kg , p.o.) for four weeks.



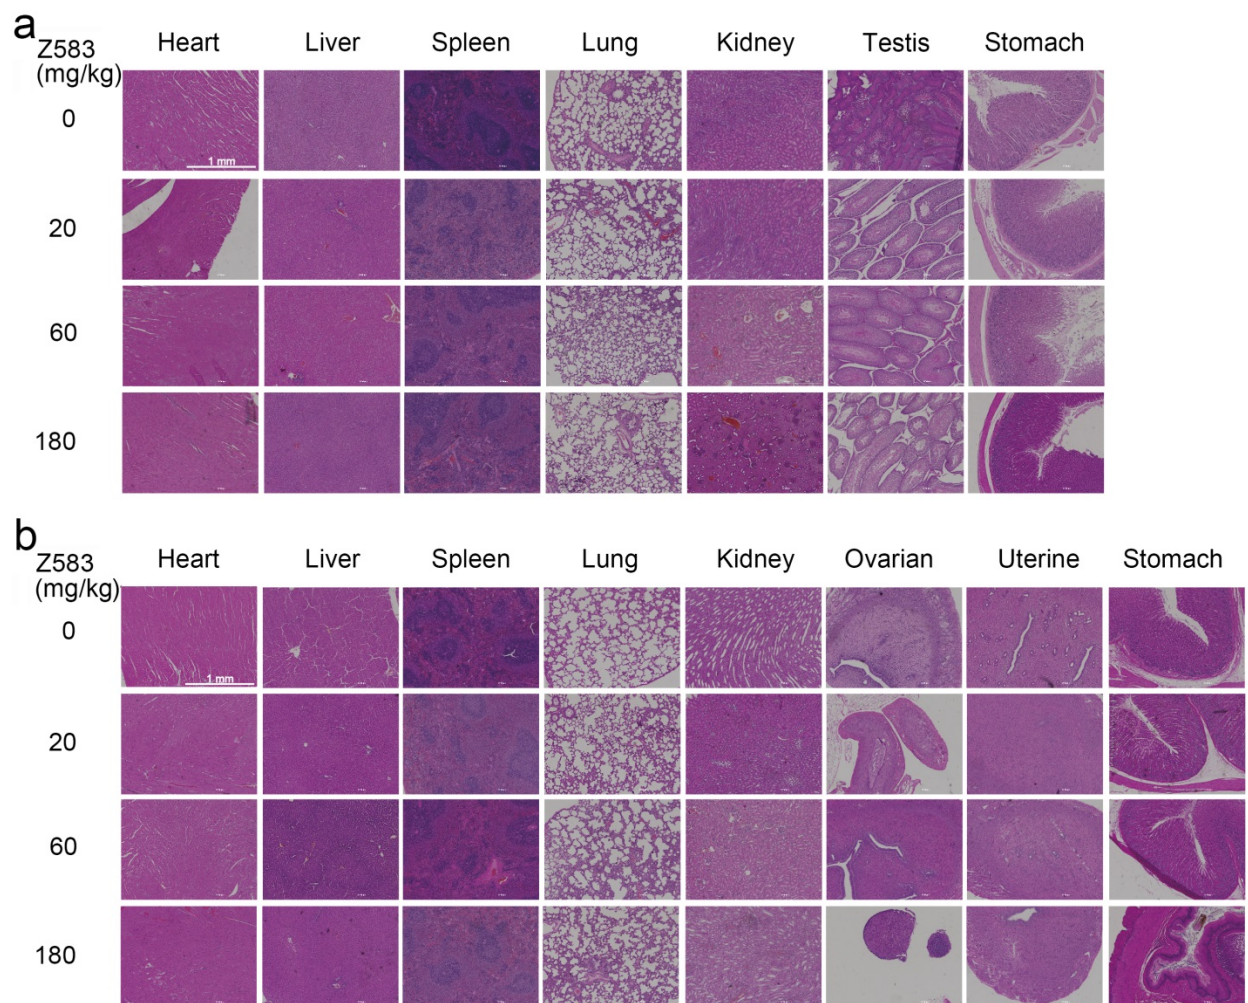

**Fig. S6. Histological images of organs from subacute toxicity experiment.** Organs stained by H&E obtained from heart, liver, spleen, lung, kidney stomach, testis, ovarian and uterine of (A) male and (B) female rat after treating with Z583 (20, 60, and 180 mg/kg, p.o.) for four weeks.

**Table S1.** 463 kinase selectivity screening of Z583 at a concentration of 100 nM (Discover X).

| <b>Kinase Tested</b>          | <b>Percent Control</b> | <b>Kinase Tested</b> | <b>Percent Control</b> |
|-------------------------------|------------------------|----------------------|------------------------|
| AAK1                          | 7.6                    | MAP3K15              | 94                     |
| ABL1(E255K)-phosphorylated    | 6.1                    | MAP3K2               | 80                     |
| ABL1(F317I)-nonphosphorylated | 77                     | MAP3K3               | 100                    |
| ABL1(F317I)-phosphorylated    | 69                     | MAP3K4               | 100                    |
| ABL1(F317L)-nonphosphorylated | 17                     | MAP4K2               | 48                     |
| ABL1(F317L)-phosphorylated    | 24                     | MAP4K3               | 100                    |
| ABL1(H396P)-phosphorylated    | 8.2                    | MAP4K4               | 78                     |
| ABL1(M351T)-phosphorylated    | 8.5                    | MAP4K5               | 93                     |
| ABL1(Q252H)-nonphosphorylated | 14                     | MAPKAPK2             | 100                    |
| ABL1(Q252H)-phosphorylated    | 8.9                    | MAPKAPK5             | 96                     |
| ABL1(T315I)-nonphosphorylated | 16                     | MARK1                | 85                     |
| ABL1(T315I)-phosphorylated    | 14                     | MARK2                | 100                    |
| ABL1(Y253F)-phosphorylated    | 7.7                    | MARK3                | 100                    |
| ABL1-nonphosphorylated        | 2.1                    | MARK4                | 85                     |
| ABL1-phosphorylated           | 9.3                    | MAST1                | 100                    |
| ABL2                          | 15                     | MEK1                 | 100                    |
| ACVR1                         | 97                     | MEK2                 | 99                     |
| ACVR1B                        | 93                     | MEK3                 | 75                     |
| ACVR2A                        | 98                     | MEK4                 | 100                    |
| ACVR2B                        | 87                     | MEK5                 | 80                     |
| ACVRL1                        | 100                    | MEK6                 | 86                     |
| ADCK3                         | 100                    | MELK                 | 71                     |
| ADCK4                         | 100                    | MERTK                | 100                    |
| AKT1                          | 100                    | MET                  | 57                     |
| AKT2                          | 100                    | MET(M1250T)          | 73                     |
| AKT3                          | 100                    | MET(Y1235D)          | 100                    |
| ALK                           | 80                     | MINK                 | 84                     |
| ALK(C1156Y)                   | 77                     | MKK7                 | 80                     |
| ALK(L1196M)                   | 89                     | MKNK1                | 84                     |
| AMPK-alpha1                   | 100                    | MKNK2                | 22                     |
| AMPK-alpha2                   | 100                    | MLCK                 | 81                     |
| ANKK1                         | 100                    | MLK1                 | 51                     |
| ARK5                          | 37                     | MLK2                 | 56                     |
| ASK1                          | 100                    | MLK3                 | 87                     |
| ASK2                          | 92                     | MRCKA                | 100                    |
| AURKC                         | 0.55                   | MRCKB                | 100                    |
| AXL                           | 100                    | MST1                 | 100                    |
| BIKE                          | 3.3                    | MST1R                | 100                    |
| BLK                           | 1.6                    | MST2                 | 82                     |

|               |     |                       |     |
|---------------|-----|-----------------------|-----|
| BMPR1A        | 88  | MST3                  | 100 |
| BMPR1B        | 67  | MST4                  | 100 |
| BMPR2         | 90  | MTOR                  | 100 |
| BMX           | 0   | MUSK                  | 94  |
| BRAF          | 98  | MYLK                  | 100 |
| BRAF(V600E)   | 89  | MYLK2                 | 67  |
| BRK           | 97  | MYLK4                 | 85  |
| BRSK1         | 100 | MYO3A                 | 100 |
| BRSK2         | 100 | MYO3B                 | 57  |
| BTK           | 0   | NDR1                  | 100 |
| BUB1          | 86  | NDR2                  | 100 |
| CAMK1         | 100 | NEK1                  | 100 |
| CAMK1B        | 92  | NEK10                 | 91  |
| CAMK1D        | 100 | NEK11                 | 96  |
| CAMK1G        | 97  | NEK2                  | 100 |
| CAMK2A        | 100 | NEK3                  | 67  |
| CAMK2B        | 99  | NEK4                  | 100 |
| CAMK2D        | 100 | NEK5                  | 57  |
| CAMK2G        | 100 | NEK6                  | 100 |
| CAMK4         | 100 | NEK7                  | 97  |
| CAMKK1        | 95  | NEK9                  | 99  |
| CAMKK2        | 76  | NIK                   | 69  |
| CASK          | 99  | NIM1                  | 98  |
| CDC2L1        | 100 | NLK                   | 100 |
| CDC2L2        | 100 | OSR1                  | 93  |
| CDC2L5        | 79  | p38-alpha             | 100 |
| CDK11         | 100 | p38-beta              | 98  |
| CDK2          | 85  | p38-delta             | 100 |
| CDK3          | 88  | p38-gamma             | 86  |
| CDK4          | 97  | PAK1                  | 100 |
| CDK4-cyclinD1 | 78  | PAK2                  | 83  |
| CDK4-cyclinD3 | 75  | PAK3                  | 95  |
| CDK5          | 97  | PAK4                  | 100 |
| CDK7          | 55  | PAK6                  | 98  |
| CDK8          | 93  | PAK7                  | 100 |
| CDK9          | 100 | PCK1                  | 86  |
| CDKL1         | 85  | PCK2                  | 100 |
| CDKL2         | 69  | PCK3                  | 100 |
| CDKL3         | 77  | PDGFRA                | 69  |
| CDKL5         | 100 | PDGFRB                | 17  |
| CHEK1         | 100 | PDPK1                 | 75  |
| CHEK2         | 88  | PFCDPK1(P.falciparum) | 100 |
| CIT           | 80  | PFPK5(P.falciparum)   | 87  |
| CLK1          | 91  | PFTAIRE2              | 100 |
| CLK2          | 32  | PFTK1                 | 100 |
| CLK3          | 100 | PHKG1                 | 100 |

|                           |     |                      |     |
|---------------------------|-----|----------------------|-----|
| CLK4                      | 100 | PHKG2                | 100 |
| CSF1R                     | 44  | PIK3C2B              | 79  |
| CSF1R-autoinhibited       | 3.4 | PIK3C2G              | 72  |
| CSK                       | 100 | PIK3CA               | 80  |
| CSNK1A1                   | 90  | PIK3CA(C420R)        | 82  |
| CSNK1A1L                  | 100 | PIK3CA(E542K)        | 100 |
| CSNK1D                    | 100 | PIK3CA(E545A)        | 87  |
| CSNK1E                    | 100 | PIK3CA(E545K)        | 100 |
| CSNK1G1                   | 100 | PIK3CA(H1047L)       | 97  |
| CSNK1G2                   | 94  | PIK3CA(H1047Y)       | 87  |
| CSNK1G3                   | 100 | PIK3CA(I800L)        | 100 |
| CSNK2A1                   | 70  | PIK3CA(M1043I)       | 67  |
| CSNK2A2                   | 23  | PIK3CA(Q546K)        | 97  |
| CTK                       | 100 | PIK3CB               | 100 |
| DAPK1                     | 94  | PIK3CD               | 62  |
| DAPK2                     | 100 | PIK3CG               | 26  |
| DAPK3                     | 100 | PIK4CB               | 72  |
| DCAMKL1                   | 99  | PIKFYVE              | 72  |
| DCAMKL2                   | 100 | PIM1                 | 100 |
| DCAMKL3                   | 100 | PIM2                 | 100 |
| DDR1                      | 100 | PIM3                 | 99  |
| DDR2                      | 80  | PIP5K1A              | 3.3 |
| DLK                       | 93  | PIP5K1C              | 54  |
| DMPK                      | 89  | PIP5K2B              | 8.2 |
| DMPK2                     | 96  | PIP5K2C              | 29  |
| DRAK1                     | 2   | PKAC-alpha           | 100 |
| DRAK2                     | 1.8 | PKAC-beta            | 100 |
| DYRK1A                    | 100 | PKMYT1               | 100 |
| DYRK1B                    | 85  | PKN1                 | 100 |
| DYRK2                     | 100 | PKN2                 | 42  |
| EGFR                      | 100 | PKNB(M.tuberculosis) | 56  |
| EGFR(E746-A750del)        | 90  | PLK1                 | 96  |
| EGFR(G719C)               | 35  | PLK2                 | 100 |
| EGFR(G719S)               | 43  | PLK3                 | 100 |
| EGFR(L747-E749del, A750P) | 91  | PLK4                 | 11  |
| EGFR(L747-S752del, P753S) | 87  | PRKCD                | 100 |
| EGFR(L747-T751del,Sins)   | 100 | PRKCE                | 100 |
| EGFR(L858R)               | 88  | PRKCH                | 100 |
| EGFR(L858R,T790M)         | 21  | PRKCI                | 72  |
| EGFR(L861Q)               | 68  | PRKCQ                | 100 |
| EGFR(S752-I759del)        | 94  | PRKD1                | 100 |
| EGFR(T790M)               | 28  | PRKD2                | 100 |
| EIF2AK1                   | 85  | PRKD3                | 100 |
| EPHA1                     | 31  | PRKG1                | 100 |
| EPHA2                     | 90  | PRKG2                | 100 |
| EPHA3                     | 80  | PRKR                 | 99  |

|              |     |                               |     |
|--------------|-----|-------------------------------|-----|
| EPHA4        | 100 | PRKX                          | 100 |
| EPHA5        | 80  | PRP4                          | 23  |
| EPHA6        | 100 | PYK2                          | 100 |
| EPHA7        | 100 | QSK                           | 100 |
| EPHA8        | 100 | RAF1                          | 100 |
| EPHB1        | 86  | RET                           | 67  |
| EPHB2        | 87  | RET(M918T)                    | 67  |
| EPHB3        | 100 | RET(V804L)                    | 91  |
| EPHB4        | 94  | RET(V804M)                    | 73  |
| EPHB6        | 29  | RIOK1                         | 13  |
| ERBB2        | 88  | RIOK2                         | 67  |
| ERBB3        | 100 | RIOK3                         | 4.5 |
| ERBB4        | 43  | RIPK1                         | 92  |
| ERK1         | 78  | RIPK2                         | 94  |
| ERK2         | 86  | RIPK4                         | 87  |
| ERK3         | 94  | RIPK5                         | 88  |
| ERK4         | 100 | ROCK1                         | 74  |
| ERK5         | 100 | ROCK2                         | 47  |
| ERK8         | 27  | ROS1                          | 61  |
| ERN1         | 100 | RPS6KA4(Kin.Dom.1-N-terminal) | 100 |
| FAK          | 100 | RPS6KA4(Kin.Dom.2-C-terminal) | 86  |
| FER          | 100 | RPS6KA5(Kin.Dom.1-N-terminal) | 100 |
| FES          | 100 | RPS6KA5(Kin.Dom.2-C-terminal) | 99  |
| FGFR1        | 27  | RSK1(Kin.Dom.1-N-terminal)    | 100 |
| FGFR2        | 27  | RSK1(Kin.Dom.2-C-terminal)    | 93  |
| FGFR3        | 43  | RSK2(Kin.Dom.1-N-terminal)    | 95  |
| FGFR3(G697C) | 39  | RSK2(Kin.Dom.2-C-terminal)    | 96  |
| FGFR4        | 83  | RSK3(Kin.Dom.1-N-terminal)    | 100 |
| FGR          | 35  | RSK3(Kin.Dom.2-C-terminal)    | 99  |
| FLT1         | 29  | RSK4(Kin.Dom.1-N-terminal)    | 82  |
| FLT3         | 12  | RSK4(Kin.Dom.2-C-terminal)    | 100 |
| FLT3(D835H)  | 15  | S6K1                          | 90  |
| FLT3(D835Y)  | 33  | SBK1                          | 90  |
| FLT3(ITD)    | 38  | SGK                           | 75  |

|                              |      |                           |     |
|------------------------------|------|---------------------------|-----|
| FLT3(ITD,D835V)              | 26   | SgK110                    | 21  |
| KIT(V559D,T670I)             | 55   | SGK2                      | 76  |
| FLT3(ITD,F691L)              | 9.6  | SGK3                      | 96  |
| FLT3(K663Q)                  | 46   | SIK                       | 85  |
| FLT3(N841I)                  | 3.2  | SIK2                      | 81  |
| FLT3(R834Q)                  | 20   | SLK                       | 84  |
| FLT3-autoinhibited           | 75   | SNARK                     | 20  |
| FLT4                         | 26   | SNRK                      | 89  |
| FRK                          | 52   | SRC                       | 26  |
| FYN                          | 100  | SRMS                      | 100 |
| GAK                          | 95   | SRPK1                     | 11  |
| GCN2(Kin.Dom.2,S808G)        | 100  | SRPK2                     | 65  |
| GRK1                         | 100  | SRPK3                     | 16  |
| GRK2                         | 100  | STK16                     | 19  |
| GRK3                         | 91   | STK33                     | 100 |
| GRK4                         | 11   | STK35                     | 100 |
| GRK7                         | 97   | STK36                     | 94  |
| GSK3A                        | 100  | STK39                     | 100 |
| GSK3B                        | 100  | SYK                       | 100 |
| HASPIN                       | 74   | TAK1                      | 79  |
| HCK                          | 100  | TAOK1                     | 27  |
| HIPK1                        | 88   | TAOK2                     | 82  |
| HIPK2                        | 84   | TAOK3                     | 44  |
| HIPK3                        | 100  | TBK1                      | 27  |
| HIPK4                        | 95   | TEC                       | 4.1 |
| HPK1                         | 54   | TESK1                     | 100 |
| HUNK                         | 100  | TGFBR1                    | 100 |
| ICK                          | 46   | TGFBR2                    | 100 |
| IGF1R                        | 98   | TIE1                      | 21  |
| IKK-alpha                    | 100  | TIE2                      | 92  |
| IKK-beta                     | 98   | TLK1                      | 100 |
| IKK-epsilon                  | 50   | TLK2                      | 100 |
| INSR                         | 87   | TNIK                      | 100 |
| INSRR                        | 98   | TNK1                      | 5.5 |
| IRAK1                        | 74   | TNK2                      | 73  |
| IRAK3                        | 75   | TNNI3K                    | 97  |
| IRAK4                        | 95   | TRKA                      | 40  |
| ITK                          | 31   | TRKB                      | 56  |
| JAK1(JH1domain-catalytic)    | 71   | TRKC                      | 70  |
| JAK1(JH2domain-pseudokinase) | 80   | TRPM6                     | 54  |
| JAK2(JH1domain-catalytic)    | 4.1  | TSSK1B                    | 100 |
| JAK3(JH1domain-catalytic)    | 0.35 | TSSK3                     | 94  |
| JNK1                         | 72   | TTK                       | 59  |
| JNK2                         | 88   | TXK                       | 0.3 |
| JNK3                         | 73   | TYK2(JH1domain-catalytic) | 16  |

|                   |     |        |     |
|-------------------|-----|--------|-----|
| KIT               | 29  | TYRO3  | 83  |
| KIT(A829P)        | 5.4 | ULK1   | 63  |
| KIT(D816H)        | 22  | ULK2   | 97  |
| KIT(D816V)        | 21  | ULK3   | 77  |
| KIT(L576P)        | 12  | VEGFR2 | 16  |
| KIT(V559D)        | 20  | VPS34  | 21  |
| KIT(V559D,V654A)  | 76  | VRK2   | 76  |
| KIT-autoinhibited | 66  | WEE1   | 100 |
| LATS1             | 68  | WEE2   | 100 |
| LATS2             | 83  | WNK1   | 100 |
| LCK               | 95  | WNK2   | 90  |
| LIMK1             | 45  | WNK3   | 96  |
| LIMK2             | 91  | WNK4   | 91  |
| LKB1              | 61  | YANK1  | 84  |
| LOK               | 100 | YANK2  | 100 |
| LRRK2             | 64  | YANK3  | 100 |
| LRRK2(G2019S)     | 36  | YES    | 43  |
| LTK               | 100 | YSK1   | 100 |
| LYN               | 81  | YSK4   | 1.4 |
| LZK               | 100 | ZAK    | 99  |
| MAK               | 97  | ZAP70  | 54  |
| MAP3K1            | 100 |        |     |

Note: Data for binding interactions are reported as %control, where lower numbers indicate stronger hits in the matrix.

**Table S2.** The hematological index of rats in subacute toxicity assay.

| <b>Day 0</b>              | <b>Male<br/>(vehicle)</b> | <b>Male<br/>(20 mg/kg)</b> | <b>Male<br/>(60 mg/kg)</b> | <b>Male<br/>(180 mg/kg)</b> | <b>Female<br/>(vehicle)</b> | <b>Female<br/>(20 mg/kg)</b> | <b>Female<br/>(60 mg/kg)</b> | <b>Female<br/>(180 mg/kg)</b> |
|---------------------------|---------------------------|----------------------------|----------------------------|-----------------------------|-----------------------------|------------------------------|------------------------------|-------------------------------|
| WBC (10 <sup>9</sup> /l)  | 11.22±3.35                | 10.48±1.62                 | 9.81±5.54                  | 9.42±1.20                   | 10.31±1.29                  | 10.42±2.09                   | 12.61±1.28                   | 8.72±2.49                     |
| LYM (10 <sup>9</sup> /l)  | 8.66±2.74                 | 8.41±1.40                  | 7.56±4.35                  | 7.39±1.30                   | 8.40±1.47                   | 8.43±1.81                    | 9.88±0.78                    | 7.42±2.14                     |
| MONO(10 <sup>9</sup> /l)  | 0.66±0.15                 | 0.50±0.08                  | 0.56±0.34                  | 0.61±0.19                   | 0.53±0.08                   | 0.50±0.14                    | 0.49±0.13                    | 0.30±0.09                     |
| NEUT(10 <sup>9</sup> /l)  | 1.75±0.57                 | 1.44±0.26                  | 1.60±0.88                  | 1.28±0.19                   | 1.24±0.27                   | 1.36±0.43                    | 2.11±0.51                    | 0.92±0.36                     |
| EO (10 <sup>9</sup> /l)   | 0.11±0.03                 | 0.08±0.04                  | 0.05±0.04                  | 0.08±0.03                   | 0.09±0.02                   | 0.09±0.03                    | 0.07±0.02                    | 0.06±0.03                     |
| BASO(10 <sup>9</sup> /l)  | 0.04±0.01                 | 0.05±0.01                  | 0.04±0.03                  | 0.05±0.02                   | 0.04±0.02                   | 0.05±0.02                    | 0.06±0.02                    | 0.02±0.02                     |
| LYM (%)                   | 76.82±3.80                | 80.20±2.29                 | 72.60±10.36                | 78.12±4.93                  | 81.10±4.49                  | 80.78±4.28                   | 78.56±3.02                   | 85.14±2.92                    |
| MONO (%)                  | 6.08±1.10                 | 4.84±0.53                  | 5.76±1.13                  | 6.64±2.21                   | 5.30±1.27                   | 4.86±1.23                    | 3.86±0.91                    | 3.42±0.55                     |
| NEUT (%)                  | 15.74±2.90                | 13.78±1.97                 | 20.48±9.57                 | 13.78±2.46                  | 12.26±3.31                  | 13.06±3.04                   | 16.58±2.61                   | 10.48±2.36                    |
| EO (%)                    | 0.98±0.33                 | 0.76±0.29                  | 0.86±0.83                  | 0.84±0.27                   | 0.88±0.24                   | 0.84±0.21                    | 0.56±0.17                    | 0.66±0.15                     |
| BASO (%)                  | 0.38±0.13                 | 0.42±0.08                  | 0.30±0.21                  | 0.62±0.24                   | 0.46±0.19                   | 0.46±0.18                    | 0.44±0.05                    | 0.30±0.19                     |
| RBC (10 <sup>12</sup> /l) | 5.95±0.78                 | 5.82±0.21                  | 5.10±1.83                  | 5.81±0.22                   | 5.65±0.17                   | 5.45±0.38                    | 5.81±0.30                    | 5.31±0.30                     |
| HGB (g/l)                 | 130.00±15.36              | 127.40±5.64                | 111.60±38.64               | 130.20±4.60                 | 125.20±1.10                 | 119.40±6.50                  | 130.60±7.30                  | 123.00±6.20                   |
| HCT                       | 37.20±3.76                | 37.12±1.64                 | 32.34±10.88                | 37.42±1.47                  | 35.28±0.44                  | 33.30±2.19                   | 35.80±1.98                   | 33.84±2.01                    |
| MCV (fl)                  | 62.64±2.04                | 63.78±0.90                 | 64.36±3.85                 | 64.44±0.15                  | 62.52±1.63                  | 61.14±2.08                   | 61.64±0.45                   | 63.76±1.37                    |
| MCH (pg)                  | 21.90±0.23                | 21.90±0.35                 | 22.06±1.01                 | 22.40±0.25                  | 22.26±0.68                  | 21.98±0.89                   | 22.50±0.25                   | 23.18±0.67                    |
| MCHC (g/l)                | 349.60±7.77               | 343.20±2.59                | 342.40±8.91                | 348.00±3.39                 | 356.20±3.56                 | 359.80±7.19                  | 364.80±6.46                  | 363.80±5.45                   |
| RDW-SD(%)                 | 35.58±1.81                | 35.74±2.05                 | 37.68±2.50                 | 36.98±1.90                  | 33.88±1.66                  | 34.28±0.97                   | 34.54±1.52                   | 35.46±2.70                    |
| RDW-CV                    | 13.92±0.83                | 13.70±0.83                 | 14.32±1.02                 | 13.94±0.66                  | 12.88±0.54                  | 13.18±0.36                   | 13.26±0.50                   | 13.12±0.88                    |
| PLT (10 <sup>9</sup> /l)  | 925.00±397.8              | 835.4±193.14               | 842.6±453.34               | 906.4±279.53                | 878.2±412.72                | 1094.8±72.53                 | 1057.6±64.01                 | 982.8±418.07                  |
| MPV (fl)                  | 5.56±0.42                 | 5.78±0.45                  | 5.44±0.11                  | 5.66±0.35                   | 6.00±0.37                   | 5.18±0.24                    | 5.60±0.23                    | 5.32±0.24                     |
| PCT                       | 0.50±0.20                 | 0.48±0.10                  | 0.46±0.25                  | 0.51±0.14                   | 0.52±0.24                   | 0.57±0.06                    | 0.59±0.03                    | 0.52±0.21                     |
| PDW (fl)                  | 15.62±0.19                | 15.66±0.11                 | 16.02±0.81                 | 15.68±0.11                  | 15.84±0.33                  | 15.48±0.15                   | 15.68±0.13                   | 15.84±0.43                    |
| <b>Day 7</b>              | <b>Male<br/>(vehicle)</b> | <b>Male<br/>(20 mg/kg)</b> | <b>Male<br/>(60 mg/kg)</b> | <b>Male<br/>(180 mg/kg)</b> | <b>Female<br/>(vehicle)</b> | <b>Female<br/>(20 mg/kg)</b> | <b>Female<br/>(60 mg/kg)</b> | <b>Female<br/>(180 mg/kg)</b> |
| WBC(10 <sup>9</sup> /l)   | 8.01±3.55                 | 10.50±2.12                 | 8.74±1.64                  | 8.04±1.44                   | 7.97±0.77                   | 9.11±1.90                    | 8.22±2.62                    | 8.76±2.33                     |
| LYM (10 <sup>9</sup> /l)  | 6.69±3.29                 | 8.87±1.80                  | 7.15±2.28                  | 6.68±1.35                   | 6.49±1.14                   | 7.76±1.72                    | 6.85±2.23                    | 7.61±1.97                     |
| MONO(10 <sup>9</sup> /l)  | 0.43±0.11                 | 0.48±0.18                  | 0.33±0.10                  | 0.42±0.03                   | 0.36±0.05                   | 0.37±0.10                    | 0.34±0.18                    | 0.27±0.07                     |



|                    |                           |                            |                            |                             |                             |                              |                              |                               |
|--------------------|---------------------------|----------------------------|----------------------------|-----------------------------|-----------------------------|------------------------------|------------------------------|-------------------------------|
| NEUT( $10^9/l$ )   | 0.80±0.20                 | 1.06±0.21                  | 1.19±1.03                  | 0.82±0.19                   | 0.97±0.47                   | 0.84±0.28                    | 0.91±0.32                    | 0.78±0.36                     |
| EO ( $10^9/l$ )    | 0.07±0.03                 | 0.08±0.04                  | 0.05±0.02                  | 0.07±0.01                   | 0.10±0.01                   | 0.10±0.02                    | 0.07±0.03                    | 0.06±0.02                     |
| BASO( $10^9/l$ )   | 0.03±0.01                 | 0.03±0.01                  | 0.03±0.02                  | 0.04±0.01                   | 0.05±0.01                   | 0.04±0.01                    | 0.04±0.02                    | 0.04±0.01                     |
| LYM (%)            | 82.36±3.67                | 84.38±2.70                 | 80.58±14.95                | 82.90±2.72                  | 80.94±8.32                  | 84.80±4.24                   | 83.26±3.14                   | 86.98±1.08                    |
| MONO (%)           | 5.72±1.22                 | 4.50±0.94                  | 3.65±0.57                  | 5.34±1.04                   | 4.60±0.82                   | 4.16±0.87                    | 4.24±1.65                    | 3.24±0.96                     |
| NEUT (%)           | 10.68±3.01                | 10.18±2.09                 | 14.88±14.79                | 10.28±2.14                  | 12.58±7.55                  | 9.36±3.08                    | 11.08±1.32                   | 8.64±1.71                     |
| EO (%)             | 0.84±0.25                 | 0.68±0.30                  | 0.55±0.21                  | 0.94±0.30                   | 1.30±0.16                   | 1.20±0.45                    | 0.96±0.28                    | 0.66±0.25                     |
| BASO (%)           | 0.40±0.20                 | 0.26±0.09                  | 0.35±0.24                  | 0.54±0.15                   | 0.58±0.19                   | 0.48±0.13                    | 0.46±0.15                    | 0.48±0.08                     |
| RBC( $10^{12}/l$ ) | 6.05±0.51                 | 5.96±0.43                  | 6.22±0.78                  | 5.90±0.24                   | 5.60±0.25                   | 5.73±0.40                    | 5.91±0.25                    | 5.81±0.59                     |
| HGB (g/l)          | 134.60±13.50              | 133.00±10.07               | 136.75±12.12               | 132.60±6.62                 | 130.00±5.15                 | 131.20±9.12                  | 132.20±5.36                  | 134.60±12.60                  |
| HCT                | 38.64±3.72                | 38.30±2.71                 | 39.63±2.95                 | 37.60±1.78                  | 35.18±1.81                  | 35.62±2.81                   | 36.88±1.80                   | 37.36±3.35                    |
| MCV (fl)           | 63.88±1.41                | 64.26±1.30                 | 64.00±3.58                 | 63.72±1.30                  | 62.80±1.19                  | 62.16±2.07                   | 62.36±0.50                   | 64.44±2.28                    |
| MCH (pg)           | 22.24±0.55                | 22.32±0.19                 | 22.05±0.89                 | 22.48±0.41                  | 23.20±0.41                  | 22.90±0.58                   | 22.38±0.37                   | 23.20±0.85                    |
| MCHC(g/l)          | 348.20±4.60               | 347.00±5.70                | 345.00±8.29                | 352.40±5.41                 | 369.20±4.92                 | 368.20±8.04                  | 358.60±5.86                  | 360.00±5.43                   |
| RDW-SD(%)          | 38.38±3.41                | 37.34±1.86                 | 37.15±1.87                 | 37.34±0.88                  | 35.96±0.65                  | 36.06±1.23                   | 36.88±1.49                   | 36.58±3.41                    |
| RDW-CV             | 14.80±1.31                | 14.16±0.71                 | 13.93±0.73                 | 14.00±0.48                  | 13.36±0.30                  | 13.40±0.48                   | 13.86±0.63                   | 13.26±1.00                    |
| PLT( $10^9/l$ )    | 1169.8±196.4              | 1211±134.22                | 1360.75±113.9              | 1205.2±86.46                | 1217.2±239.3                | 1337.8±96.76                 | 1078.6±461.3                 | 1150±434.39                   |
| MPV (fl)           | 5.44±0.18                 | 5.56±0.30                  | 5.70±0.29                  | 5.54±0.27                   | 5.54±0.29                   | 5.20±0.24                    | 5.62±0.19                    | 5.32±0.26                     |
| PCT                | 0.64±0.11                 | 0.67±0.08                  | 0.77±0.08                  | 0.66±0.04                   | 0.68±0.13                   | 0.70±0.04                    | 0.60±0.25                    | 0.61±0.23                     |
| PDW (fl)           | 15.64±0.17                | 15.74±0.15                 | 15.88±0.13                 | 15.76±0.11                  | 15.90±0.17                  | 15.74±0.15                   | 15.90±0.35                   | 15.84±0.26                    |
| <b>Day 14</b>      | <b>Male<br/>(vehicle)</b> | <b>Male<br/>(20 mg/kg)</b> | <b>Male<br/>(60 mg/kg)</b> | <b>Male<br/>(180 mg/kg)</b> | <b>Female<br/>(vehicle)</b> | <b>Female<br/>(20 mg/kg)</b> | <b>Female<br/>(60 mg/kg)</b> | <b>Female<br/>(180 mg/kg)</b> |
| WBC( $10^9/l$ )    | 8.43±2.34                 | 10.40±6.51                 | 11.04±1.83                 | 10.97±2.37                  | 7.68±1.60                   | 10.47±2.88                   | 7.99±0.83                    | 8.45±1.85                     |
| LYM( $10^9/l$ )    | 6.67±1.65                 | 8.21±4.84                  | 8.97±2.92                  | 8.57±2.30                   | 6.25±1.35                   | 8.78±2.66                    | 6.26±1.10                    | 7.09±1.83                     |
| MONO( $10^9/l$ )   | 0.47±0.10                 | 0.51±0.36                  | 0.58±0.29                  | 0.61±0.09                   | 0.46±0.17                   | 0.48±0.14                    | 0.49±0.14                    | 0.33±0.10                     |
| NEUT( $10^9/l$ )   | 1.15±0.60                 | 1.58±1.41                  | 1.37±0.86                  | 1.68±0.59                   | 0.80±0.35                   | 1.04±0.33                    | 1.11±0.39                    | 0.95±0.43                     |
| EO ( $10^9/l$ )    | 0.09±0.03                 | 0.07±0.04                  | 0.08±0.04                  | 0.07±0.02                   | 0.10±0.05                   | 0.10±0.03                    | 0.07±0.02                    | 0.07±0.03                     |
| BASO( $10^9/l$ )   | 0.05±0.03                 | 0.03±0.03                  | 0.05±0.01                  | 0.04±0.01                   | 0.07±0.03                   | 0.08±0.03                    | 0.05±0.03                    | 0.02±0.01                     |
| LYM (%)            | 79.56±2.48                | 80.78±5.12                 | 79.48±15.90                | 77.66±6.17                  | 81.40±4.44                  | 83.54±3.83                   | 78.00±8.27                   | 83.40±6.49                    |
| MONO (%)           | 5.64±1.41                 | 4.36±1.39                  | 5.80±4.08                  | 5.64±1.13                   | 6.10±2.56                   | 4.60±1.23                    | 6.20±2.02                    | 3.86±0.57                     |
| NEUT (%)           | 13.08±2.87                | 13.90±4.46                 | 13.60±11.47                | 15.64±5.48                  | 10.26±3.70                  | 10.14±2.54                   | 14.14±5.80                   | 11.68±6.67                    |
| EO (%)             | 1.14±0.30                 | 0.66±0.11                  | 0.75±0.49                  | 0.68±0.29                   | 1.38±0.74                   | 0.94±0.19                    | 0.96±0.26                    | 0.82±0.30                     |

|                          |                           |                            |                            |                             |                             |                              |                              |                               |
|--------------------------|---------------------------|----------------------------|----------------------------|-----------------------------|-----------------------------|------------------------------|------------------------------|-------------------------------|
| BASO (%)                 | 0.58±0.26                 | 0.30±0.12                  | 0.38±0.13                  | 0.38±0.13                   | 0.86±0.24                   | 0.78±0.47                    | 0.70±0.51                    | 0.24±0.09                     |
| RBC(10 <sup>12</sup> /l) | 6.01±0.68                 | 6.09±0.75                  | 6.43±0.37                  | 6.60±0.26                   | 6.12±0.22                   | 6.54±0.20                    | 6.28±0.30                    | 5.62±1.31                     |
| HGB (g/l)                | 133.40±8.26               | 135.20±15.04               | 144.25±2.06                | 145.60±5.81                 | 133.80±3.56                 | 137.80±4.32                  | 135.60±4.56                  | 126.20±27.22                  |
| HCT                      | 37.42±2.88                | 38.82±3.74                 | 40.38±0.59                 | 41.48±1.76                  | 38.84±0.63                  | 40.46±1.44                   | 39.00±1.87                   | 36.44±7.95                    |
| MCV (fl)                 | 62.52±2.80                | 63.88±2.03                 | 62.95±3.80                 | 62.76±0.80                  | 63.46±1.49                  | 61.94±3.13                   | 62.10±1.07                   | 65.08±2.56                    |
| MCH (pg)                 | 22.28±1.42                | 22.20±0.38                 | 22.53±1.46                 | 22.06±0.39                  | 21.88±0.61                  | 21.10±0.92                   | 21.60±0.41                   | 22.52±1.24                    |
| MCHC(g/l)                | 356.00±7.31               | 347.60±5.59                | 357.50±2.65                | 351.20±2.95                 | 344.80±5.07                 | 341.00±4.42                  | 348.00±6.20                  | 346.00±5.57                   |
| RDW-SD(%)                | 36.76±2.34                | 36.34±0.38                 | 38.65±2.60                 | 33.76±2.16                  | 38.64±1.63                  | 36.92±0.63                   | 36.92±2.27                   | 35.82±3.00                    |
| RDW-CV                   | 14.36±0.81                | 13.92±0.36                 | 14.93±1.98                 | 13.36±0.82                  | 14.46±0.57                  | 14.18±0.60                   | 14.24±0.64                   | 13.32±0.83                    |
| PLT(10 <sup>9</sup> /l)  | 1008.8±482.4              | 919.6±520.16               | 1152.0±78.64               | 1074.0±210.5                | 857.6±388.18                | 839.8±430.25                 | 961.0±199.59                 | 1008.6±407.8                  |
| MPV (fl)                 | 6.48±0.44                 | 6.24±0.38                  | 6.48±0.22                  | 6.46±0.24                   | 6.44±0.25                   | 6.24±0.19                    | 6.46±0.11                    | 6.24±0.28                     |
| PCT                      | 0.64±0.29                 | 0.58±0.32                  | 0.75±0.07                  | 0.69±0.11                   | 0.55±0.23                   | 0.52±0.27                    | 0.62±0.12                    | 0.62±0.25                     |
| PDW (fl)                 | 15.90±0.79                | 16.42±2.01                 | 15.53±0.05                 | 15.40±0.12                  | 16.02±0.89                  | 15.94±0.77                   | 15.58±0.08                   | 15.48±0.30                    |
| <b>Day 21</b>            | <b>Male<br/>(vehicle)</b> | <b>Male<br/>(20 mg/kg)</b> | <b>Male<br/>(60 mg/kg)</b> | <b>Male<br/>(180 mg/kg)</b> | <b>Female<br/>(vehicle)</b> | <b>Female<br/>(20 mg/kg)</b> | <b>Female<br/>(60 mg/kg)</b> | <b>Female<br/>(180 mg/kg)</b> |
| WBC(10 <sup>9</sup> /l)  | 9.84±5.63                 | 10.72±2.78                 | 9.34±3.60                  | 7.77±0.87                   | 11.58±2.17                  | 11.02±0.77                   | 12.27±2.52                   | 7.26±4.12                     |
| LYM (10 <sup>9</sup> /l) | 7.87±4.98                 | 8.59±2.50                  | 6.98±2.49                  | 5.50±0.83                   | 9.79±1.68                   | 9.34±0.51                    | 10.34±1.58                   | 5.94±3.29                     |
| MONO(10 <sup>9</sup> /l) | 0.54±0.29                 | 0.58±0.33                  | 0.64±0.81                  | 0.55±0.19                   | 0.40±0.26                   | 0.40±0.03                    | 0.34±0.15                    | 0.39±0.30                     |
| NEUT(10 <sup>9</sup> /l) | 1.23±0.95                 | 1.36±0.19                  | 1.57±1.16                  | 1.55±0.45                   | 1.22±0.35                   | 1.13±0.21                    | 1.45±0.80                    | 0.78±0.50                     |
| EO (10 <sup>9</sup> /l)  | 0.12±0.08                 | 0.10±0.03                  | 0.10±0.06                  | 0.12±0.09                   | 0.13±0.04                   | 0.10±0.03                    | 0.08±0.02                    | 0.08±0.06                     |
| BASO(10 <sup>9</sup> /l) | 0.08±0.06                 | 0.08±0.05                  | 0.05±0.04                  | 0.05±0.02                   | 0.04±0.01                   | 0.05±0.02                    | 0.06±0.01                    | 0.07±0.06                     |
| LYM (%)                  | 79.30±8.75                | 79.58±4.88                 | 77.68±15.16                | 70.80±7.55                  | 84.70±2.55                  | 84.90±1.44                   | 84.90±4.33                   | 81.04±5.08                    |
| MONO (%)                 | 5.58±1.84                 | 5.18±1.66                  | 6.22±6.99                  | 7.16±2.79                   | 3.23±1.60                   | 3.57±0.23                    | 2.67±0.75                    | 4.84±1.76                     |
| NEUT (%)                 | 12.96±6.65                | 13.42±4.59                 | 14.56±8.50                 | 19.86±5.24                  | 10.57±2.66                  | 10.17±1.23                   | 11.33±3.95                   | 12.14±4.60                    |
| EO (%)                   | 1.44±0.61                 | 1.06±0.31                  | 1.04±0.44                  | 1.46±0.97                   | 1.13±0.21                   | 0.90±0.20                    | 0.63±0.15                    | 1.26±0.46                     |
| BASO (%)                 | 0.72±0.40                 | 0.76±0.29                  | 0.50±0.29                  | 0.72±0.23                   | 0.37±0.06                   | 0.47±0.15                    | 0.47±0.15                    | 0.72±0.54                     |
| RBC(10 <sup>12</sup> /l) | 7.19±0.59                 | 7.12±0.52                  | 6.47±0.70                  | 6.87±0.31                   | 6.37±0.66                   | 6.21±0.55                    | 6.51±0.19                    | 5.44±1.01                     |
| HGB (g/l)                | 152.60±15.68              | 150.20±10.71               | 137.20±11.82               | 146.20±6.10                 | 140.00±10.82                | 137.00±7.81                  | 142.33±2.08                  | 123.20±21.16                  |
| HCT                      | 42.44±3.74                | 42.40±2.65                 | 39.06±3.66                 | 41.42±1.52                  | 39.23±4.05                  | 37.97±1.97                   | 39.23±0.57                   | 35.06±5.46                    |
| MCV (fl)                 | 59.00±1.70                | 59.58±1.09                 | 60.60±3.60                 | 60.36±1.44                  | 61.63±2.23                  | 61.33±3.74                   | 60.27±1.76                   | 64.86±2.62                    |
| MCH (pg)                 | 21.16±0.71                | 21.12±0.53                 | 21.32±1.33                 | 21.30±0.73                  | 22.07±0.78                  | 22.13±1.32                   | 21.87±0.42                   | 22.70±1.05                    |
| MCHC (g/l)               | 358.60±7.30               | 354.40±5.59                | 351.80±4.09                | 352.80±3.70                 | 358.33±9.29                 | 361.00±2.00                  | 362.67±7.64                  | 349.80±10.78                  |

|                           |                           |                            |                            |                             |                             |                              |                              |                               |
|---------------------------|---------------------------|----------------------------|----------------------------|-----------------------------|-----------------------------|------------------------------|------------------------------|-------------------------------|
| RDW-SD(%)                 | 34.82±1.99                | 35.02±0.69                 | 36.16±3.12                 | 33.26±0.74                  | 39.17±2.43                  | 39.80±1.56                   | 37.97±2.05                   | 40.58±1.32                    |
| RDW-CV                    | 14.44±0.64                | 14.42±0.50                 | 14.88±2.22                 | 13.58±0.56                  | 14.87±0.61                  | 15.20±0.72                   | 15.00±0.44                   | 14.86±0.58                    |
| PLT(10 <sup>9</sup> /l)   | 667.20±369.8              | 689.2±195.64               | 660.60±503.83              | 859.8±422.04                | 895.0±490.27                | 1,075.0±45.03                | 698.3±515.99                 | 633.8±422.61                  |
| MPV (fl)                  | 5.92±0.22                 | 6.30±0.28                  | 6.30±0.21                  | 5.92±0.34                   | 6.10±0.61                   | 5.70±0.10                    | 5.93±0.42                    | 5.50±0.32                     |
| PCT                       | 0.40±0.23                 | 0.43±0.11                  | 0.41±0.30                  | 0.50±0.24                   | 0.53±0.26                   | 0.61±0.02                    | 0.40±0.29                    | 0.35±0.24                     |
| PDW (fl)                  | 15.88±0.28                | 15.96±0.31                 | 16.00±0.48                 | 15.74±0.44                  | 16.27±0.81                  | 15.67±0.06                   | 16.47±1.42                   | 16.14±0.73                    |
| <b>Day 28</b>             | <b>Male<br/>(vehicle)</b> | <b>Male<br/>(20 mg/kg)</b> | <b>Male<br/>(60 mg/kg)</b> | <b>Male<br/>(180 mg/kg)</b> | <b>Female<br/>(vehicle)</b> | <b>Female<br/>(20 mg/kg)</b> | <b>Female<br/>(60 mg/kg)</b> | <b>Female<br/>(180 mg/kg)</b> |
| WBC (10 <sup>9</sup> /l)  | 10.47±1.21                | 10.53±1.04                 | 11.23±2.97                 | 12.17±3.15                  | 10.90±2.61                  | 13.05±3.44                   | 10.98±1.85                   | 10.13±0.87                    |
| LYM (10 <sup>9</sup> /l)  | 8.34±0.76                 | 8.72±1.01                  | 8.79±2.60                  | 9.07±2.34                   | 9.12±2.26                   | 11.12±3.65                   | 9.55±1.78                    | 8.49±0.65                     |
| MONO(10 <sup>9</sup> /l)  | 0.58±0.21                 | 0.42±0.12                  | 0.63±0.18                  | 1.02±0.49                   | 0.32±0.06                   | 0.51±0.16                    | 0.30±0.05                    | 0.38±0.08                     |
| NEUT(10 <sup>9</sup> /l)  | 1.42±0.61                 | 1.26±0.06                  | 1.64±0.85                  | 1.88±0.49                   | 1.32±0.44                   | 1.26±0.41                    | 1.01±0.12                    | 1.12±0.15                     |
| EO (10 <sup>9</sup> /l)   | 0.09±0.03                 | 0.11±0.04                  | 0.12±0.04                  | 0.12±0.04                   | 0.11±0.02                   | 0.12±0.05                    | 0.09±0.02                    | 0.10±0.06                     |
| BASO(10 <sup>9</sup> /l)  | 0.04±0.01                 | 0.03±0.01                  | 0.05±0.03                  | 0.08±0.03                   | 0.05±0.02                   | 0.04±0.02                    | 0.03±0.02                    | 0.04±0.03                     |
| LYM (%)                   | 79.95±5.59                | 82.70±1.85                 | 78.40±8.71                 | 74.62±3.58                  | 83.44±3.65                  | 84.04±6.71                   | 86.80±2.00                   | 83.90±1.66                    |
| MONO (%)                  | 5.48±1.53                 | 3.90±0.85                  | 5.60±1.19                  | 8.24±2.26                   | 3.00±0.58                   | 4.16±1.58                    | 2.78±0.56                    | 3.72±0.66                     |
| NEUT (%)                  | 13.30±4.24                | 12.03±1.89                 | 14.43±7.12                 | 15.54±2.27                  | 12.14±3.11                  | 10.62±5.31                   | 9.38±1.65                    | 11.02±0.89                    |
| EO (%)                    | 0.88±0.19                 | 1.03±0.25                  | 1.15±0.42                  | 1.00±0.29                   | 0.98±0.26                   | 0.86±0.22                    | 0.85±0.10                    | 0.96±0.53                     |
| BASO (%)                  | 0.40±0.08                 | 0.33±0.12                  | 0.43±0.17                  | 0.60±0.10                   | 0.44±0.22                   | 0.32±0.15                    | 0.20±0.16                    | 0.40±0.19                     |
| RBC (10 <sup>12</sup> /l) | 6.77±0.17                 | 6.68±0.36                  | 6.61±0.53                  | 6.66±0.93                   | 6.32±0.25                   | 6.17±0.53                    | 6.51±0.64                    | 5.85±0.54                     |
| HGB (g/l)                 | 144.75±3.77               | 145.00±7.21                | 143.25±8.30                | 142.80±13.05                | 138.60±2.70                 | 133.40±6.31                  | 136.50±13.82                 | 131.80±6.65                   |
| HCT                       | 38.40±1.09                | 38.13±1.85                 | 37.65±1.66                 | 38.28±4.41                  | 37.70±1.28                  | 35.70±2.23                   | 37.45±3.46                   | 35.44±2.12                    |
| MCV (fl)                  | 56.78±1.55                | 57.03±0.86                 | 57.15±3.23                 | 57.64±1.98                  | 59.68±2.01                  | 57.96±1.91                   | 57.58±0.72                   | 60.74±2.74                    |
| MCH (pg)                  | 21.40±0.54                | 21.70±0.56                 | 21.70±1.22                 | 21.58±1.31                  | 21.96±0.57                  | 21.68±1.08                   | 20.95±0.57                   | 22.62±1.28                    |
| MCHC (g/l)                | 377.00±5.72               | 380.00±4.58                | 379.75±6.13                | 374.20±16.42                | 367.60±5.46                 | 374.20±8.84                  | 364.25±6.70                  | 372.40±5.98                   |
| RDW-SD(%)                 | 33.73±1.69                | 33.93±0.57                 | 34.25±3.43                 | 33.48±1.46                  | 35.94±1.74                  | 34.00±1.44                   | 32.68±1.43                   | 34.52±1.47                    |
| RDW-CV                    | 14.10±0.49                | 14.10±0.30                 | 14.33±2.02                 | 13.82±0.74                  | 14.10±0.42                  | 13.66±0.51                   | 13.35±0.48                   | 13.34±0.25                    |
| PLT (10 <sup>9</sup> /l)  | 911.75±318.3              | 963.0±148.62               | 822.50±505.56              | 835.0±288.04                | 999.20±273.99               | 1033.2±102.84                | 866.00±357.09                | 988.40±314.22                 |
| MPV (fl)                  | 5.93±0.39                 | 5.97±0.31                  | 6.28±0.52                  | 5.76±0.38                   | 5.82±0.44                   | 5.98±0.27                    | 5.70±0.18                    | 5.84±0.29                     |
| PCT                       | 0.53±0.16                 | 0.57±0.06                  | 0.50±0.30                  | 0.48±0.17                   | 0.57±0.13                   | 0.62±0.05                    | 0.50±0.21                    | 0.57±0.16                     |
| PDW (fl)                  | 15.83±0.26                | 15.77±0.15                 | 16.78±2.08                 | 15.84±0.23                  | 15.66±0.37                  | 15.88±0.08                   | 15.48±0.19                   | 15.70±0.41                    |

**Table S3.** The biochemistry index of rats in subacute toxicity.

| <b>Day 0</b> | <b>Male<br/>(vehicle)</b> | <b>Male<br/>(20 mg/kg)</b> | <b>Male<br/>(60 mg/kg)</b> | <b>Male<br/>(180 mg/kg)</b> | <b>Female<br/>(vehicle)</b> | <b>Female<br/>(20 mg/kg)</b> | <b>Female<br/>(60 mg/kg)</b> | <b>Female<br/>(180 mg/kg)</b> |
|--------------|---------------------------|----------------------------|----------------------------|-----------------------------|-----------------------------|------------------------------|------------------------------|-------------------------------|
| ALT(U/l)     | 55.60±6.80                | 49.40±8.73                 | 45.80±4.97                 | 51.20±12.07                 | 48.80±26.87                 | 72.00±53.25                  | 44.20±5.54                   | 51.80±5.07                    |
| AST(U/l)     | 138.60±44.96              | 132.80±22.10               | 120.6±18.82                | 96.40±54.45                 | 152.40±34.20                | 126.20±14.01                 | 133.6±35.42                  | 113.4±22.81                   |
| TBA(μM)      | 77.78±51.81               | 73.62±31.22                | 40.40±23.72                | 67.16±31.68                 | 54.08±31.26                 | 41.60±14.37                  | 54.16±37.08                  | 49.48±27.57                   |
| CHO(mM)      | 2.35±0.27                 | 2.05±0.16                  | 2.09±0.21                  | 1.91±0.79                   | 2.08±0.27                   | 2.00±0.12                    | 2.09±0.35                    | 2.16±0.23                     |
| HDL(mM)      | 0.96±0.09                 | 0.77±0.08                  | 0.79±0.08                  | 0.75±0.32                   | 0.85±0.14                   | 0.74±0.04                    | 0.76±0.11                    | 0.79±0.08                     |
| LDL(mM)      | 0.37±0.08                 | 0.33±0.03                  | 0.30±0.03                  | 0.23±0.10                   | 0.29±0.04                   | 0.26±0.04                    | 0.27±0.04                    | 0.27±0.04                     |
| TG(mM)       | 0.73±0.19                 | 0.62±0.32                  | 0.87±0.35                  | 0.88±0.52                   | 0.66±0.12                   | 0.64±0.15                    | 0.71±0.36                    | 1.02±0.11                     |
| ALB(g/l)     | 27.72±1.76                | 23.72±3.51                 | 25.14±1.69                 | 25.70±3.06                  | 28.96±2.22                  | 27.46±2.64                   | 26.30±2.68                   | 26.28±1.23                    |
| GLU(μM)      | 6.36±0.55                 | 5.47±0.89                  | 5.45±0.30                  | 4.65±2.31                   | 6.17±0.69                   | 5.49±0.35                    | 5.61±0.72                    | 5.58±0.36                     |
| Urea(μM)     | 5.17±1.06                 | 4.03±0.48                  | 3.78±0.40                  | 3.44±1.68                   | 5.59±0.31                   | 4.81±0.56                    | 5.10±0.57                    | 5.25±0.57                     |
| Cre(μM)      | 46.20±2.59                | 41.20±3.49                 | 41.20±2.86                 | 32.80±18.43                 | 48.80±4.60                  | 43.80±3.42                   | 46.40±3.97                   | 45.40±2.19                    |
| TP(g/l)      | 53.56±3.32                | 45.28±5.90                 | 46.61±3.16                 | 39.89±20.81                 | 55.02±3.99                  | 53.15±4.37                   | 50.44±5.03                   | 50.96±3.67                    |
| TBiLi(μM)    | 1.24±0.60                 | 1.40±0.23                  | 1.00±0.42                  | 0.50±0.91                   | 0.82±0.71                   | 1.06±0.53                    | 0.64±0.59                    | 0.60±0.45                     |
| D.BIL(μM)    | -0.76±0.68                | -0.24±0.32                 | -0.70±0.48                 | -0.62±1.62                  | -1.18±0.87                  | -1.06±0.81                   | -1.08±0.45                   | -0.86±0.63                    |
| UA(μM)       | 115.06±18.31              | 114.56±11.99               | 132.22±17.93               | 122.44±40.46                | 119.54±31.48                | 102.26±23.14                 | 106.6±32.37                  | 91.58±17.61                   |
| <b>Day 7</b> | <b>Male<br/>(vehicle)</b> | <b>Male<br/>(20 mg/kg)</b> | <b>Male<br/>(60 mg/kg)</b> | <b>Male<br/>(180 mg/kg)</b> | <b>Female<br/>(vehicle)</b> | <b>Female<br/>(20 mg/kg)</b> | <b>Female<br/>(60 mg/kg)</b> | <b>Female<br/>(180 mg/kg)</b> |
| ALT(U/l)     | 50.40±3.29                | 39.40±22.94                | 47.20±10.92                | 55.00±14.20                 | 47.40±8.99                  | 43.80±5.81                   | 46.60±4.34                   | 51.20±7.05                    |
| AST(U/l)     | 126.20±24.73              | 63.80±35.25                | 94.00±12.88                | 97.40±28.22                 | 139.40±72.30                | 80.80±8.53                   | 86.80±11.08                  | 77.60±15.01                   |
| TBA(μM)      | 72.60±32.24               | 60.96±42.01                | 40.70±33.92                | 53.26±46.33                 | 51.42±41.85                 | 32.70±27.38                  | 68.24±24.43                  | 49.98±33.61                   |
| CHO(mM)      | 1.99±0.14                 | 1.55±0.86                  | 1.86±0.36                  | 1.76±0.16                   | 1.90±0.22                   | 2.06±0.20                    | 1.95±0.15                    | 1.81±0.22                     |

|               |                           |                            |                            |                             |                             |                              |                              |                               |
|---------------|---------------------------|----------------------------|----------------------------|-----------------------------|-----------------------------|------------------------------|------------------------------|-------------------------------|
| HDL(mM)       | 0.78±0.05                 | 0.63±0.36                  | 0.76±0.18                  | 0.79±0.06                   | 0.73±0.10                   | 0.78±0.06                    | 0.78±0.07                    | 0.73±0.08                     |
| LDL(mM)       | 0.30±0.05                 | 0.20±0.12                  | 0.24±0.04                  | 0.25±0.04                   | 0.23±0.04                   | 0.24±0.02                    | 0.22±0.04                    | 0.21±0.02                     |
| TG(mM)        | 1.16±0.15                 | 1.00±0.60                  | 1.21±0.52                  | 1.32±0.41                   | 1.13±0.29                   | 1.14±0.28                    | 0.85±0.19                    | 0.99±0.32                     |
| ALB(g/l)      | 22.34±1.11                | 19.22±10.79                | 23.90±2.55                 | 23.90±1.33                  | 25.46±2.04                  | 26.20±1.05                   | 26.96±2.09                   | 25.48±1.57                    |
| GLU(μM)       | 5.17±0.28                 | 4.23±2.41                  | 6.24±1.25                  | 5.23±0.68                   | 5.42±0.31                   | 4.97±0.29                    | 5.36±0.32                    | 5.08±0.23                     |
| Urea(μM)      | 5.00±0.40                 | 4.17±2.34                  | 5.99±1.14                  | 5.01±0.27                   | 5.12±0.29                   | 5.42±0.70                    | 5.96±0.49                    | 6.05±0.52                     |
| Cre(μM)       | 49.00±3.54                | 39.00±20.24                | 53.20±4.60                 | 51.60±2.70                  | 54.00±2.35                  | 53.40±1.34                   | 55.00±3.94                   | 54.80±1.79                    |
| TP(g/l)       | 48.95±2.82                | 41.63±22.69                | 52.47±6.59                 | 51.66±3.02                  | 53.30±5.19                  | 54.62±1.87                   | 57.11±4.81                   | 53.15±2.83                    |
| TBiLi(μM)     | 0.96±0.44                 | 0.72±0.37                  | 0.74±0.65                  | 0.78±0.38                   | 0.64±0.45                   | 0.76±0.51                    | 1.04±0.53                    | 0.64±0.44                     |
| D.BIL(μM)     | -0.90±0.29                | -0.54±0.80                 | -1.04±0.91                 | -1.14±0.38                  | -1.98±0.90                  | -1.26±0.52                   | -1.64±0.40                   | -1.34±0.52                    |
| UA(μM)        | 110.16±11.41              | 81.66±55.72                | 127.86±22.69               | 106.98±15.55                | 128.66±36.68                | 115.68±15.53                 | 121.48±32.04                 | 112.48±20.5                   |
| <b>Day 14</b> | <b>Male<br/>(vehicle)</b> | <b>Male<br/>(20 mg/kg)</b> | <b>Male<br/>(60 mg/kg)</b> | <b>Male<br/>(180 mg/kg)</b> | <b>Female<br/>(vehicle)</b> | <b>Female<br/>(20 mg/kg)</b> | <b>Female<br/>(60 mg/kg)</b> | <b>Female<br/>(180 mg/kg)</b> |
| ALT(U/l)      | 46.00±2.00                | 47.60±8.79                 | 41.40±4.98                 | 47.40±5.03                  | 46.80±3.70                  | 48.40±8.59                   | 44.20±3.35                   | 61.40±46.04                   |
| AST(U/l)      | 134.00±26.47              | 77.20±10.18                | 82.60±27.12                | 82.40±12.66                 | 151.60±48.19                | 107.00±33.56                 | 87.00±11.90                  | 123.6±115.9                   |
| TBA(μM)       | 66.02±29.68               | 95.90±26.23                | 35.78±12.69                | 64.54±35.85                 | 47.68±22.84                 | 72.58±54.00                  | 83.20±24.10                  | 29.08±26.98                   |
| CHO(mM)       | 1.87±0.26                 | 1.73±0.17                  | 1.63±0.24                  | 1.62±0.13                   | 1.92±0.17                   | 2.07±0.21                    | 1.99±0.33                    | 1.84±0.18                     |
| HDL(mM)       | 0.73±0.10                 | 0.70±0.06                  | 0.65±0.07                  | 0.66±0.05                   | 0.72±0.05                   | 0.78±0.06                    | 0.72±0.06                    | 0.68±0.08                     |
| LDL(mM)       | 0.21±0.07                 | 0.23±0.03                  | 0.18±0.04                  | 0.22±0.04                   | 0.27±0.04                   | 0.24±0.04                    | 0.21±0.04                    | 0.20±0.04                     |
| TG(mM)        | 1.11±0.23                 | 1.02±0.17                  | 1.15±0.27                  | 1.21±0.24                   | 0.81±0.11                   | 0.97±0.38                    | 0.75±0.24                    | 0.91±0.23                     |
| ALB(g/l)      | 22.68±0.41                | 21.64±1.11                 | 20.64±1.13                 | 21.48±1.52                  | 25.68±1.55                  | 25.46±1.05                   | 24.64±1.50                   | 23.74±1.49                    |
| GLU(μM)       | 4.98±0.29                 | 4.93±0.39                  | 5.57±0.59                  | 5.18±0.51                   | 5.18±0.81                   | 5.95±0.96                    | 5.09±0.28                    | 5.33±0.36                     |
| Urea(μM)      | 4.61±0.16                 | 4.49±0.28                  | 4.60±0.48                  | 3.96±0.28                   | 5.34±0.34                   | 5.30±0.85                    | 5.01±0.43                    | 4.56±0.42                     |

|                 |                           |                            |                            |                             |                             |                              |                              |                               |
|-----------------|---------------------------|----------------------------|----------------------------|-----------------------------|-----------------------------|------------------------------|------------------------------|-------------------------------|
| Cre( $\mu$ M)   | 51.80 $\pm$ 2.77          | 49.60 $\pm$ 3.71           | 49.00 $\pm$ 3.24           | 48.60 $\pm$ 1.82            | 60.60 $\pm$ 3.78            | 57.20 $\pm$ 2.59             | 56.60 $\pm$ 3.85             | 52.20 $\pm$ 4.15              |
| TP(g/l)         | 49.84 $\pm$ 1.23          | 48.04 $\pm$ 1.85           | 45.46 $\pm$ 2.40           | 48.51 $\pm$ 0.99            | 54.94 $\pm$ 2.72            | 54.16 $\pm$ 1.71             | 54.19 $\pm$ 2.13             | 50.79 $\pm$ 3.03              |
| TBiLi( $\mu$ M) | 0.96 $\pm$ 0.59           | 1.42 $\pm$ 0.19            | 0.76 $\pm$ 0.43            | 0.80 $\pm$ 0.35             | 0.82 $\pm$ 0.44             | 1.10 $\pm$ 0.85              | 0.98 $\pm$ 0.50              | 1.00 $\pm$ 0.51               |
| D.BIL( $\mu$ M) | -1.06 $\pm$ 0.61          | -0.64 $\pm$ 0.36           | -2.96 $\pm$ 3.79           | -1.12 $\pm$ 0.36            | -1.56 $\pm$ 0.59            | -1.92 $\pm$ 1.76             | -1.66 $\pm$ 1.09             | -1.10 $\pm$ 0.33              |
| UA( $\mu$ M)    | 101.14 $\pm$ 19.79        | 85.04 $\pm$ 17.25          | 90.58 $\pm$ 27.22          | 100.32 $\pm$ 22.71          | 127.54 $\pm$ 27.52          | 90.50 $\pm$ 28.05            | 80.68 $\pm$ 18.38            | 76.66 $\pm$ 13.71             |
| <b>Day21</b>    | <b>Male<br/>(vehicle)</b> | <b>Male<br/>(20 mg/kg)</b> | <b>Male<br/>(60 mg/kg)</b> | <b>Male<br/>(180 mg/kg)</b> | <b>Female<br/>(vehicle)</b> | <b>Female<br/>(20 mg/kg)</b> | <b>Female<br/>(60 mg/kg)</b> | <b>Female<br/>(180 mg/kg)</b> |
| ALT(U/l)        | 49.20 $\pm$ 2.28          | 45.20 $\pm$ 6.83           | 46.20 $\pm$ 7.01           | 55.00 $\pm$ 6.40            | 40.00 $\pm$ 3.87            | 45.00 $\pm$ 2.45             | 40.80 $\pm$ 2.17             | 43.00 $\pm$ 6.32              |
| AST(U/l)        | 121.20 $\pm$ 28.47        | 74.00 $\pm$ 6.52           | 88.60 $\pm$ 18.34          | 89.80 $\pm$ 9.96            | 134.40 $\pm$ 11.59          | 75.00 $\pm$ 4.18             | 66.40 $\pm$ 7.73             | 68.60 $\pm$ 6.23              |
| TBA( $\mu$ M)   | 79.64 $\pm$ 44.85         | 62.26 $\pm$ 42.61          | 38.78 $\pm$ 5.78           | 57.64 $\pm$ 42.23           | 54.36 $\pm$ 32.89           | 99.72 $\pm$ 66.86            | 61.84 $\pm$ 20.83            | 58.68 $\pm$ 37.25             |
| CHO(mM)         | 1.81 $\pm$ 0.17           | 1.66 $\pm$ 0.22            | 1.56 $\pm$ 0.32            | 1.73 $\pm$ 0.34             | 1.74 $\pm$ 0.14             | 2.32 $\pm$ 0.23              | 1.75 $\pm$ 0.25              | 1.90 $\pm$ 0.27               |
| HDL(mM)         | 0.77 $\pm$ 0.09           | 0.75 $\pm$ 0.05            | 0.70 $\pm$ 0.12            | 0.73 $\pm$ 0.09             | 0.69 $\pm$ 0.07             | 0.79 $\pm$ 0.07              | 0.68 $\pm$ 0.09              | 0.72 $\pm$ 0.07               |
| LDL(mM)         | 0.22 $\pm$ 0.05           | 0.19 $\pm$ 0.06            | 0.16 $\pm$ 0.05            | 0.19 $\pm$ 0.04             | 0.19 $\pm$ 0.01             | 0.24 $\pm$ 0.05              | 0.20 $\pm$ 0.06              | 0.18 $\pm$ 0.02               |
| TG(mM)          | 1.47 $\pm$ 0.23           | 1.21 $\pm$ 0.23            | 1.43 $\pm$ 0.31            | 1.08 $\pm$ 0.38             | 0.79 $\pm$ 0.27             | 1.07 $\pm$ 0.50              | 0.67 $\pm$ 0.16              | 0.84 $\pm$ 0.33               |
| ALB(g/l)        | 27.04 $\pm$ 2.93          | 24.78 $\pm$ 1.93           | 25.80 $\pm$ 3.04           | 25.96 $\pm$ 2.65            | 25.94 $\pm$ 1.73            | 27.34 $\pm$ 1.49             | 26.02 $\pm$ 1.08             | 26.02 $\pm$ 0.90              |
| GLU( $\mu$ M)   | 5.22 $\pm$ 0.29           | 5.40 $\pm$ 0.38            | 5.42 $\pm$ 0.32            | 6.17 $\pm$ 1.01             | 5.11 $\pm$ 0.37             | 5.95 $\pm$ 0.47              | 5.65 $\pm$ 0.37              | 5.65 $\pm$ 0.63               |
| Urea( $\mu$ M)  | 5.28 $\pm$ 0.56           | 5.10 $\pm$ 0.39            | 5.29 $\pm$ 0.87            | 5.08 $\pm$ 0.38             | 5.30 $\pm$ 0.41             | 4.86 $\pm$ 0.10              | 5.79 $\pm$ 0.34              | 5.27 $\pm$ 0.17               |
| Cre( $\mu$ M)   | 52.00 $\pm$ 2.24          | 53.20 $\pm$ 3.19           | 51.60 $\pm$ 4.56           | 53.60 $\pm$ 3.78            | 57.00 $\pm$ 2.92            | 57.00 $\pm$ 1.58             | 55.40 $\pm$ 1.67             | 56.00 $\pm$ 2.00              |
| TP(g/l)         | 61.13 $\pm$ 4.30          | 56.60 $\pm$ 3.36           | 56.40 $\pm$ 6.81           | 57.85 $\pm$ 4.10            | 57.35 $\pm$ 2.33            | 61.75 $\pm$ 2.15             | 56.85 $\pm$ 1.35             | 57.49 $\pm$ 1.89              |
| TBiLi( $\mu$ M) | 0.98 $\pm$ 0.35           | 1.20 $\pm$ 0.24            | 0.62 $\pm$ 0.55            | 0.70 $\pm$ 0.39             | 0.70 $\pm$ 0.51             | 1.30 $\pm$ 0.91              | 1.08 $\pm$ 0.76              | 1.20 $\pm$ 0.85               |
| D.BIL( $\mu$ M) | -0.86 $\pm$ 0.58          | -0.64 $\pm$ 0.32           | -0.96 $\pm$ 0.36           | -1.04 $\pm$ 0.55            | -1.28 $\pm$ 0.15            | -2.24 $\pm$ 2.69             | -1.02 $\pm$ 0.43             | -0.62 $\pm$ 0.37              |
| UA( $\mu$ M)    | 108.76 $\pm$ 24.34        | 87.82 $\pm$ 16.46          | 111.82 $\pm$ 8.90          | 121.02 $\pm$ 29.63          | 121.64 $\pm$ 28.86          | 110.58 $\pm$ 5.41            | 89.08 $\pm$ 9.93             | 78.56 $\pm$ 10.64             |
| <b>Day 28</b>   | <b>Male<br/>(vehicle)</b> | <b>Male<br/>(20 mg/kg)</b> | <b>Male<br/>(60 mg/kg)</b> | <b>Male<br/>(180 mg/kg)</b> | <b>Female<br/>(vehicle)</b> | <b>Female<br/>(20 mg/kg)</b> | <b>Female<br/>(60 mg/kg)</b> | <b>Female<br/>(180 mg/kg)</b> |

|           |              |              |             |             |              |              |              |             |
|-----------|--------------|--------------|-------------|-------------|--------------|--------------|--------------|-------------|
| ALT(U/l)  | 38.60±11.67  | 35.20±10.62  | 35.00±12.59 | 46.00±16.31 | 38.20±10.45  | 37.60±12.58  | 35.20±10.26  | 31.20±10.08 |
| AST(U/l)  | 116.60±36.05 | 80.00±24.00  | 60.60±14.36 | 85.00±13.36 | 112.60±43.38 | 65.20±13.66  | 72.20±16.54  | 75.80±41.98 |
| TBA(μM)   | 36.88±18.06  | 87.42±82.21  | 14.86±11.61 | 31.42±13.06 | 27.36±17.89  | 53.86±39.10  | 37.70±21.99  | 43.96±38.95 |
| CHO(mM)   | 1.21±0.36    | 1.12±0.50    | 1.07±0.52   | 1.33±0.31   | 1.56±0.34    | 1.73±0.38    | 1.51±0.35    | 1.51±0.28   |
| HDL(mM)   | 0.52±0.16    | 0.49±0.21    | 0.47±0.24   | 0.58±0.15   | 0.62±0.15    | 0.67±0.16    | 0.61±0.15    | 0.58±0.13   |
| LDL(mM)   | 0.12±0.07    | 0.09±0.07    | 0.08±0.06   | 0.14±0.05   | 0.12±0.04    | 0.11±0.04    | 0.11±0.05    | 0.10±0.04   |
| TG(mM)    | 1.15±0.55    | 0.95±0.53    | 1.01±0.88   | 0.99±0.65   | 0.79±0.43    | 0.85±0.45    | 0.71±0.27    | 0.53±0.45   |
| ALB(g/l)  | 20.62±6.94   | 20.32±7.62   | 18.34±7.69  | 21.96±5.80  | 25.56±6.18   | 24.88±5.58   | 25.22±7.15   | 22.04±4.97  |
| GLU(μM)   | 8.09±4.22    | 6.78±2.26    | 7.15±2.16   | 9.55±4.82   | 8.16±4.75    | 6.48±2.07    | 7.96±4.15    | 6.33±2.40   |
| Urea(μM)  | 5.02±0.99    | 4.69±1.06    | 4.55±1.03   | 4.94±0.38   | 5.46±1.24    | 4.72±0.92    | 5.02±1.20    | 4.58±1.29   |
| Cre(μM)   | 45.40±10.09  | 41.80±9.76   | 42.80±8.47  | 55.60±5.50  | 56.80±2.68   | 54.20±6.22   | 54.00±6.44   | 51.80±4.76  |
| TP(g/l)   | 44.50±16.52  | 43.47±16.47  | 40.13±19.07 | 50.89±11.85 | 52.56±12.17  | 53.16±12.64  | 51.93±15.96  | 47.13±9.95  |
| TBiLi(μM) | 0.90±0.21    | 0.96±0.51    | 0.50±0.46   | 0.76±0.17   | 0.60±0.21    | 0.84±0.67    | 0.86±0.86    | 0.88±0.76   |
| D.BIL(μM) | -0.74±0.26   | -0.64±0.41   | -0.66±0.38  | -0.88±0.36  | -1.08±0.40   | -0.92±0.39   | -0.96±0.51   | -0.62±0.65  |
| UA(μM)    | 116.00±33.51 | 119.44±24.19 | 87.66±12.18 | 98.22±49.06 | 146.50±17.53 | 105.90±23.79 | 107.42±23.68 | 86.42±16.23 |

**Table S4.** Metabolic Stability of Z583 and control compound (verapamil) in Different Species of Hepatocytes

| Compound  | Species | In vitro $T_{1/2}$ (min) | In vitro $Cl_{int}$ ( $\mu\text{l}/\text{min}, 10^6$ cells) | Scale-up $Cl_{int}$ (m/min/kg) |
|-----------|---------|--------------------------|-------------------------------------------------------------|--------------------------------|
| Verapamil | Human   | 24.78                    | 55.94                                                       | 142.33                         |
|           | Mouse   | 24.16                    | 57.37                                                       | 394.68                         |
|           | Dog     | 14.58                    | 95.07                                                       | 1123.01                        |
| Z583      | Human   | 61.25                    | 22.63                                                       | 57.57                          |
|           | Mouse   | 108.10                   | 12.82                                                       | 88.21                          |
|           | Dog     | 26.66                    | 51.98                                                       | 614.05                         |

Note: If  $Cl_{int} < 0$ , then  $T_{1/2}$  and  $Cl_{int}$  were reported as “ $\infty$ ” and “0.00”, respectively.

**Table S5.** The stability results of Z583 and control compounds (propranolol and mevinolin) in human, mouse and dog whole blood.

| Compound    | Species | $T_{1/2}$ (min) | Remaining Percentages(%) |        |        |        |         |
|-------------|---------|-----------------|--------------------------|--------|--------|--------|---------|
|             |         |                 | 0 min                    | 15 min | 30 min | 60 min | 120 min |
| Propranolol | Human   | 32.05           | 100.00                   | 80.18  | 58.82  | 31.89  | 7.73    |
| Propranolol | Mouse   | 57.03           | 100.00                   | 82.78  | 72.25  | 46.46  | 23.57   |
| Mevinolin   | Dog     | 162.44          | 100.00                   | 95.23  | 92.27  | 86.05  | 59.60   |
| Z583        | Human   | 190.08          | 100.00                   | 94.49  | 90.44  | 82.17  | 64.34   |
| Z583        | Mouse   | 70.04           | 100.00                   | 85.28  | 71.17  | 43.85  | 31.53   |
| Z583        | Dog     | 105.44          | 100.00                   | 89.02  | 80.49  | 64.63  | 45.33   |



**Table S6.** Recombinant human and mouse cytokines involved in the experiments.

| <b>Cytokines</b>                 | <b>Identifier</b> | <b>Supplier</b> |
|----------------------------------|-------------------|-----------------|
| Recombinant Human IL-2           | 202-IL-010        | R&D             |
| Recombinant Human IL-4           | 204-IL-010        | R&D             |
| Recombinant Human IL-6           | 206-IL-010        | R&D             |
| Recombinant Human IL-7           | 207-IL-010        | R&D             |
| Recombinant Human IL-9           | 209-ILB-010       | R&D             |
| Recombinant Human IL-10          | 217-IL-010        | R&D             |
| Recombinant Human IL-13          | 213-ILB-010       | R&D             |
| Recombinant Human IL-15          | 247-ILB-010       | R&D             |
| Recombinant Human IL-21          | 8879-IL-010       | R&D             |
| Recombinant Human EPO            | 286-EP-250        | R&D             |
| Recombinant Human GM-CSF         | 300-03            | R&D             |
| Recombinant Human IFN- $\gamma$  | 300-02            | R&D             |
| Recombinant Mouse IL-2           | 212-12            | Peprotech       |
| Recombinant Mouse IL-4           | 214-14            | Peprotech       |
| Recombinant Mouse IL-6           | 210-16            | Peprotech       |
| Recombinant Mouse TNF- $\alpha$  | 718004            | Peprotech       |
| Recombinant Mouse IL-12          | 210-12            | Peprotech       |
| Recombinant Mouse IL-13          | 571104            | Peprotech       |
| Recombinant Mouse IL-15          | 210-15            | Peprotech       |
| Recombinant Mouse IL-1 $\beta$   | 211-11B           | Peprotech       |
| Recombinant Mouse IL-23          | 589002            | Peprotech       |
| Recombinant Mouse IFN- $\gamma$  | 315-05            | Peprotech       |
| Recombinant Mouse GM-CSF         | 315-03            | Peprotech       |
| Recombinant Human TGF- $\beta$ 1 | 100-21            | Peprotech       |
